# Supplementary material
Source: PubMed Central journal article supplement (PMC4862541)
Supplement: AAC.00196-16_zac005165138so1.pdf [file AAC.00196-16_zac005165138so1.pdf]

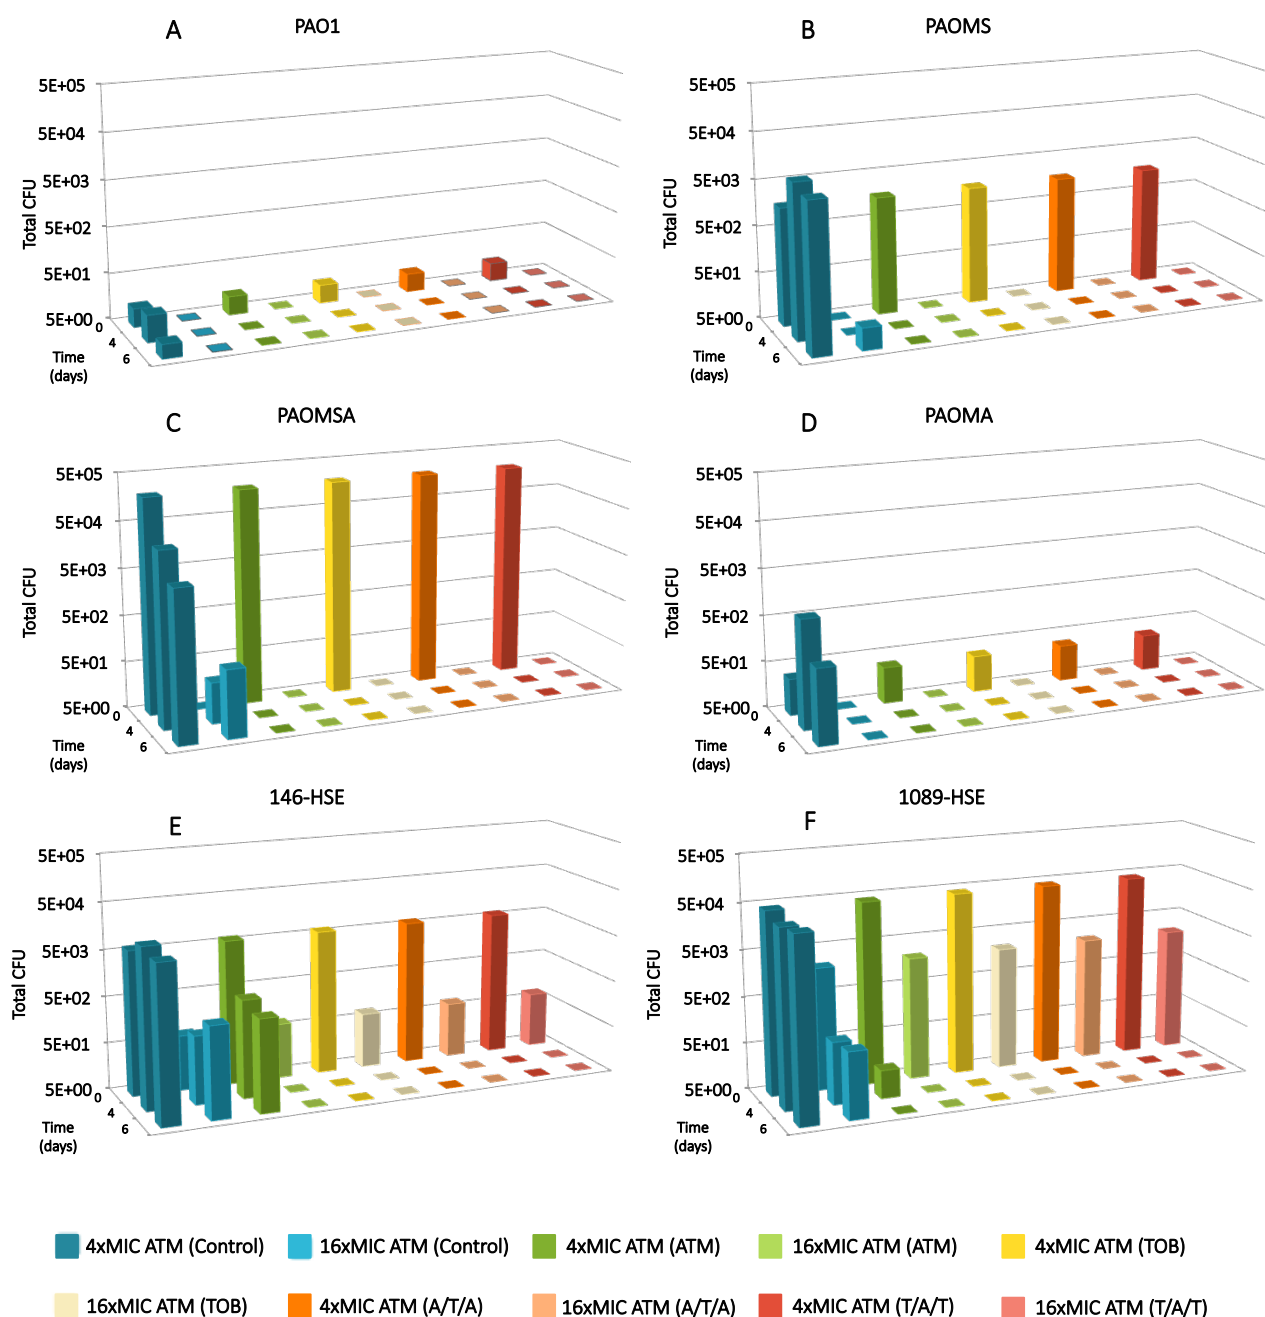

**Figure S1.** Dynamics over time of 4xMIC and 16xMIC ATM resistant mutants of biofilms treated with peak concentrations of ATM (700 mg/L), TOB (1000 mg/L), sequential therapy (A/T/A or T/A/T) or control without antibiotics. For this purpose detached and collected biofilms were plated in MHA supplemented with 4-fold and 16-fold MIC concentrations of ATM at time-points  $t_0$ ,  $t_2$ ,  $t_4$  and  $t_6$ . The results represent the medians (bars) of at least three independent experiments.

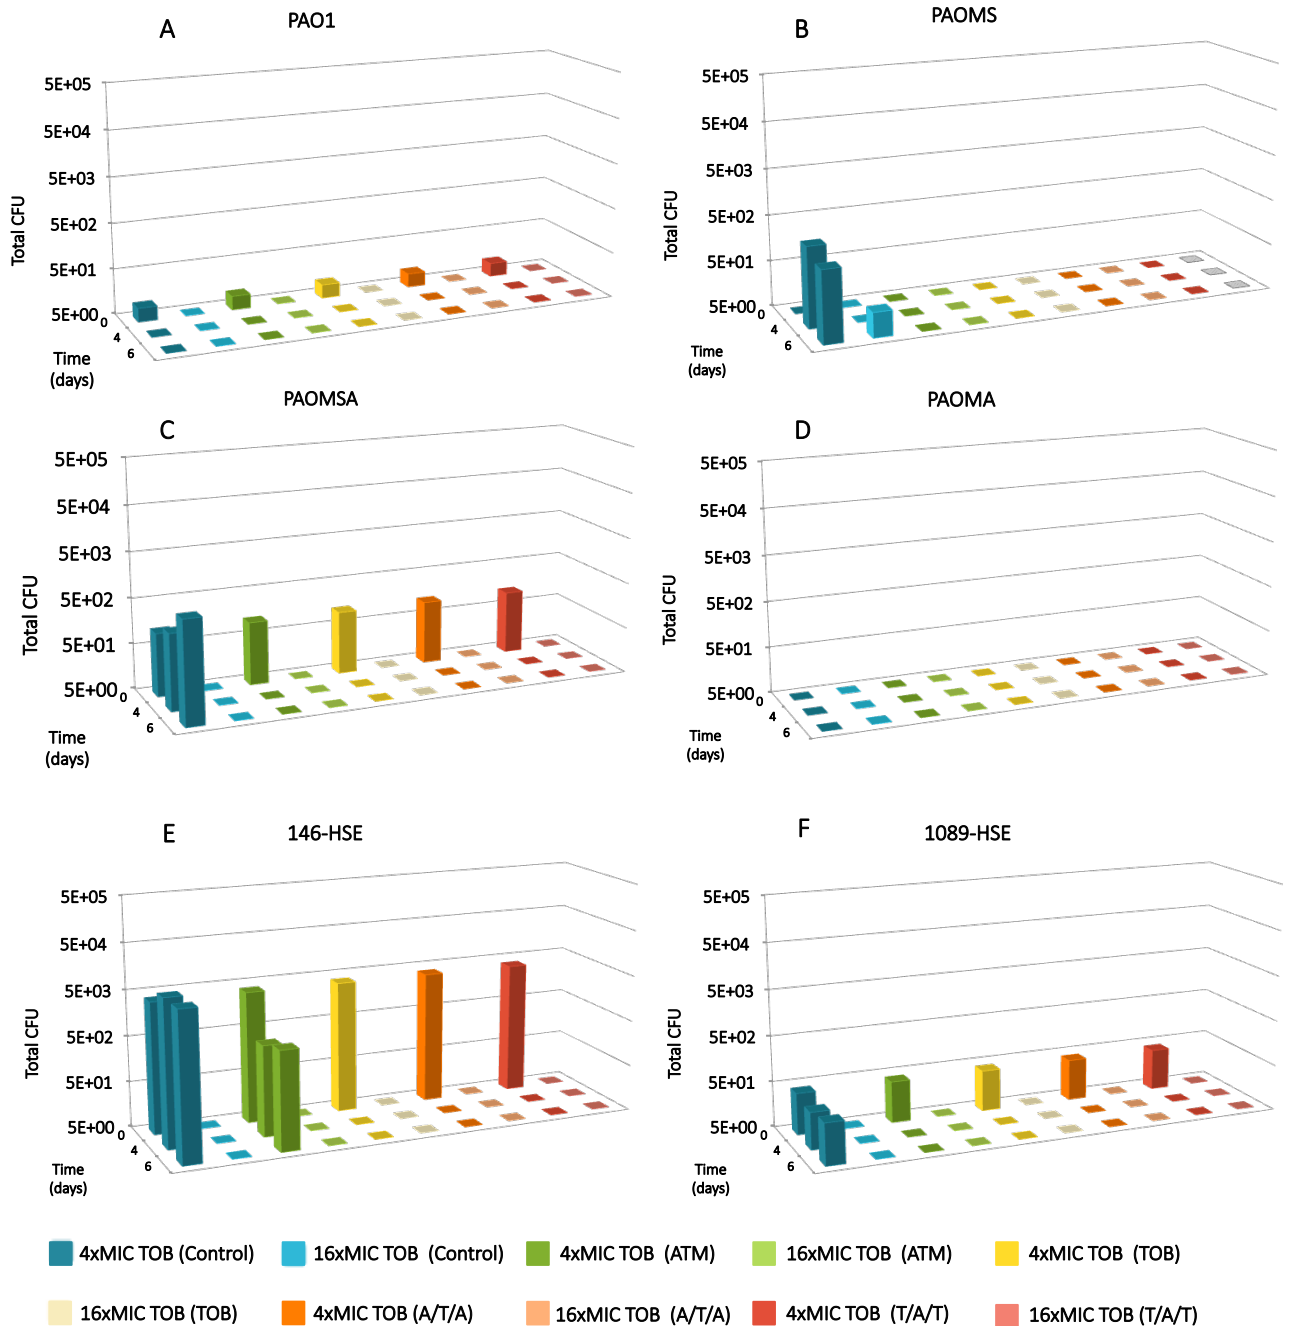

**Figure S2.** Dynamics over time of 4xMIC and 16xMIC TOB resistant mutants of biofilms treated with peak concentrations of ATM (700 mg/L), TOB (1000 mg/L), sequential therapy (A/T/A or T/A/T) or control without antibiotics. For this purpose detached and collected biofilms were plated in MHA supplemented with 4-fold and 16-fold MIC concentrations of TOB at time-points t<sub>0</sub>, t<sub>2</sub>, t<sub>4</sub> and t<sub>6</sub>. The results represent the medians (bars) of at least three independent experiments.

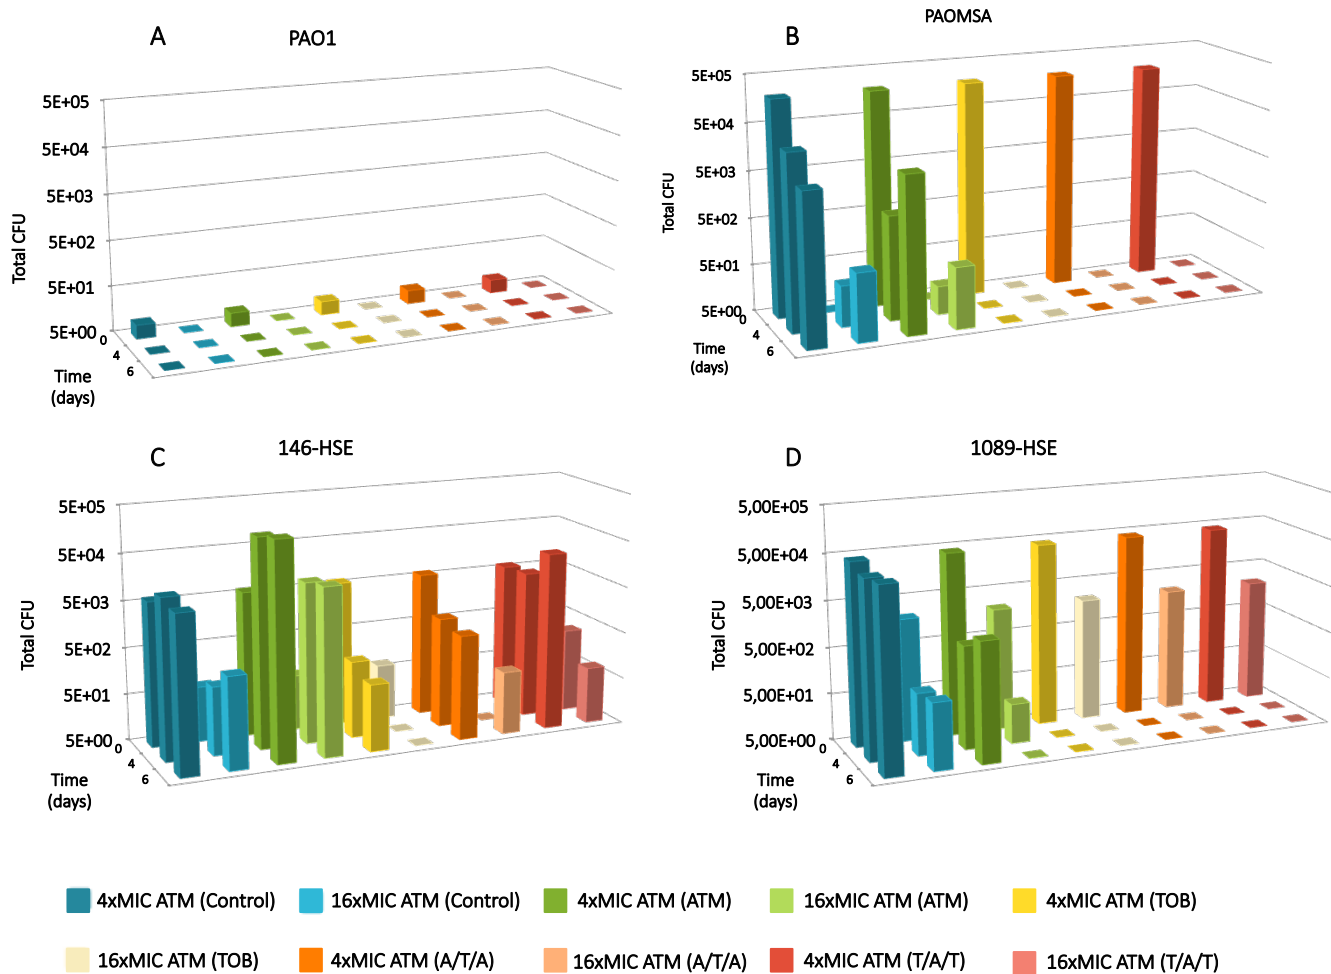

**Figure S3.** Dynamics over time of 4xMIC and 16xMIC ATM resistant mutants of biofilms treated with peak concentrations of ATM (70 mg/L), TOB (100 mg/L), sequential therapy (A/T/A or T/A/T) or control without antibiotics. For this purpose detached and collected biofilms were plated in MHA supplemented with 4-fold and 16-fold MIC concentrations of ATM at time-points  $t_0$ ,  $t_2$ ,  $t_4$  and  $t_6$ . The results represent the medians (bars) of at least three independent experiments.

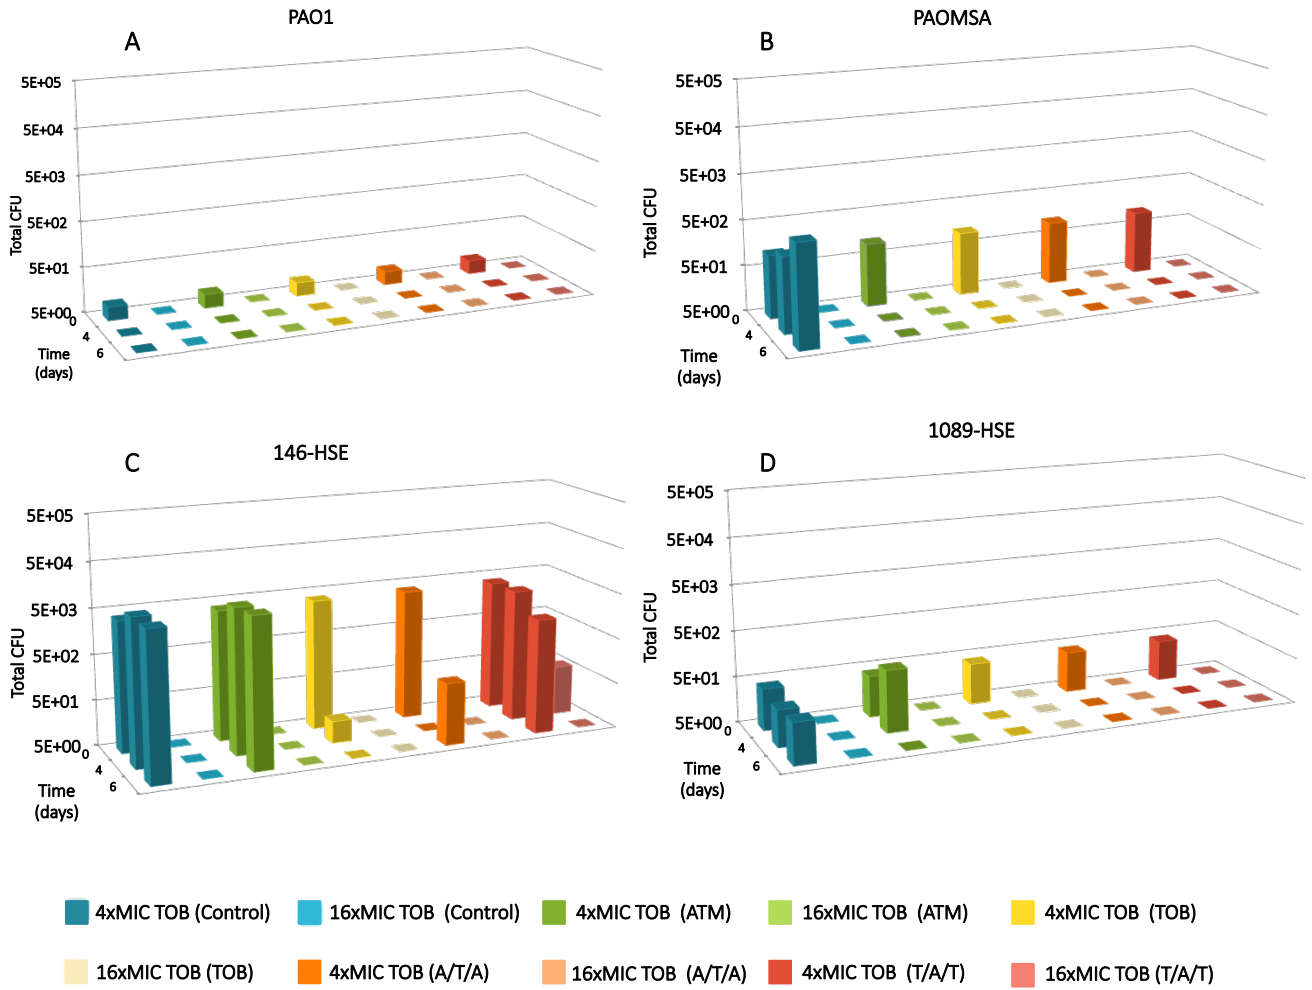

**Figure S4.** Dynamics over time of 4xMIC and 16xMIC TOB resistant mutants of biofilms treated with peak concentrations of ATM (70 mg/L), TOB (100 mg/L), sequential therapy (A/T/A or T/A/T) or control without antibiotics. For this purpose detached and collected biofilms were plated in MHA supplemented with 4-fold and 16-fold MIC concentrations of TOB at time-points t<sub>0</sub>, t<sub>2</sub>, t<sub>4</sub> and t<sub>6</sub>. The results represent the medians (bars) of at least three independent experiments.

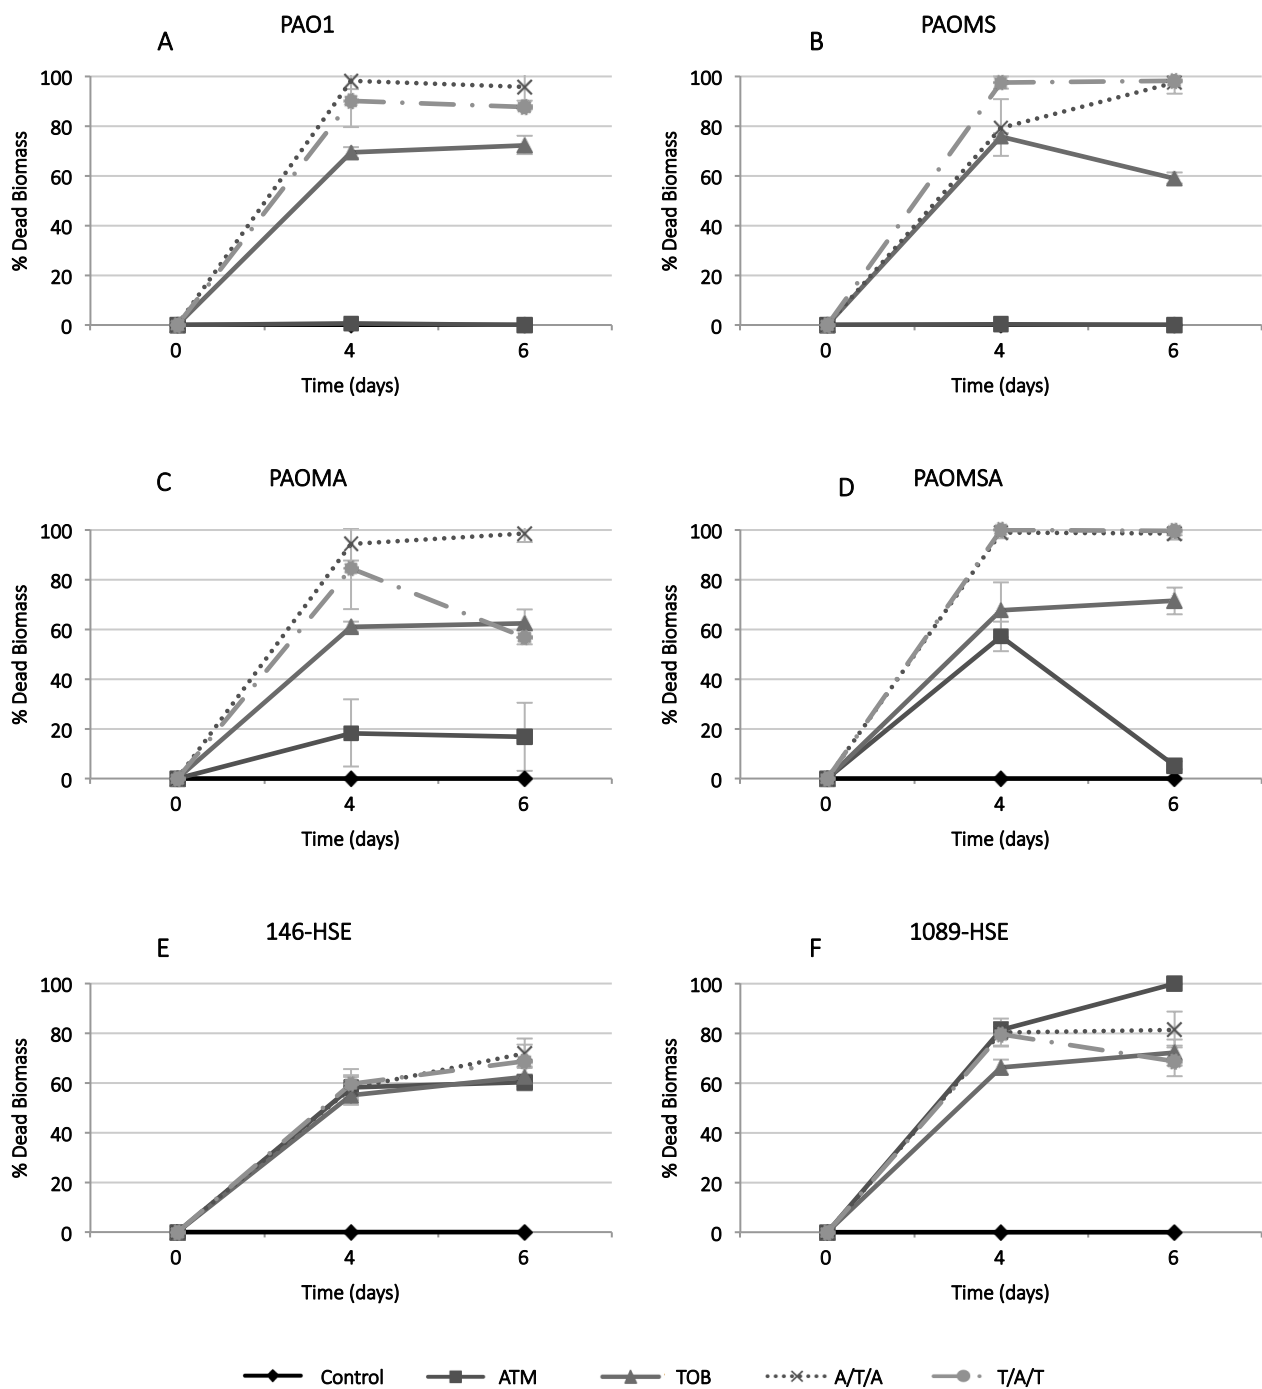

**Figure S5.** Percentage of dead biomass relative to total biomass of biofilms treated with peak concentrations (ATM 700 mg/L and TOB 1000 mg/L). The results represent the medians (points) and interquartile range (error bars) of at least three independent experiments.

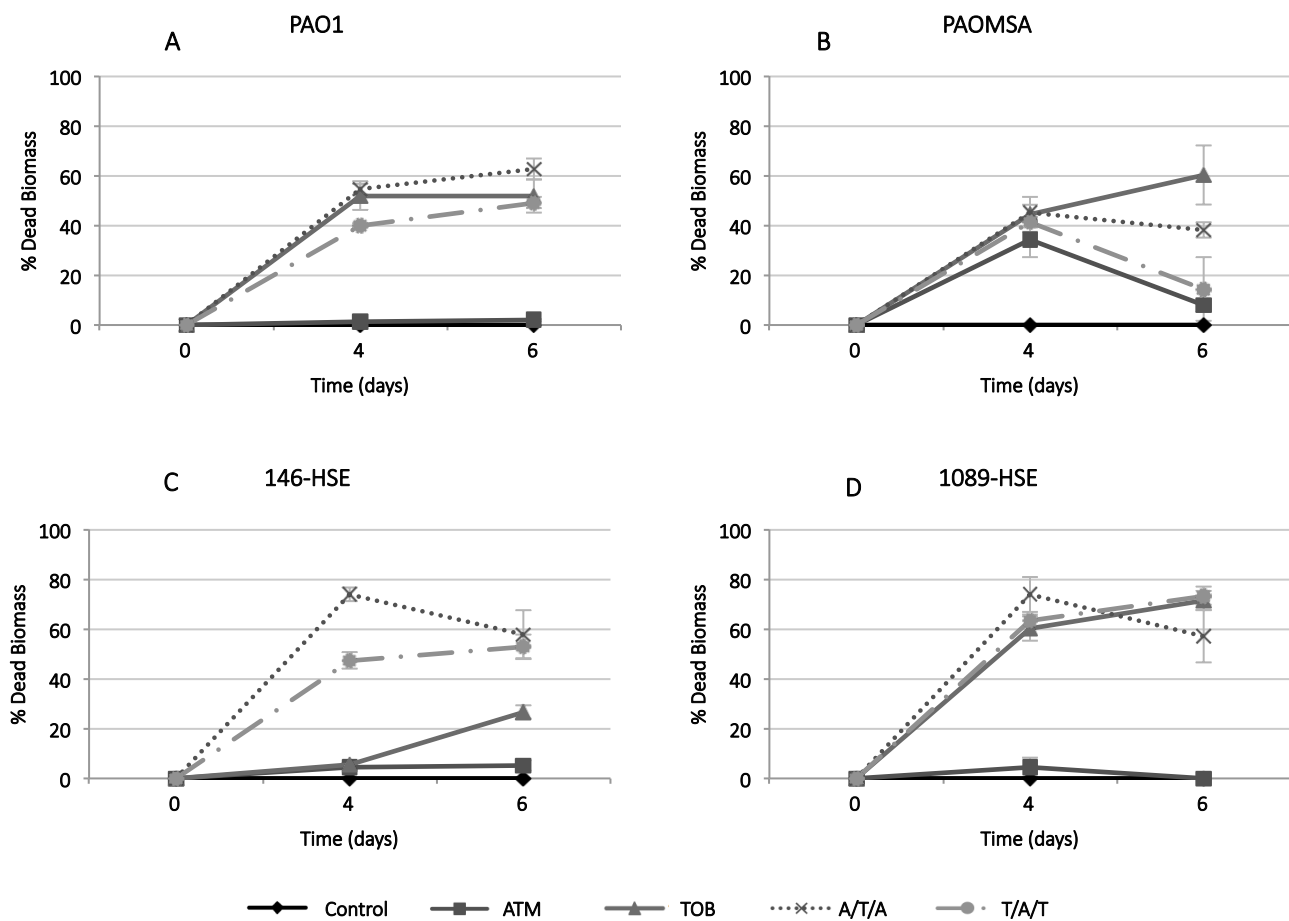

**Figure S6.** Percentage of dead biomass relative to total biomass of biofilms treated with 1/10-peak concentrations (ATM 70 mg/L and TOB 100 mg/L). The results represent the medians (points) and interquartile range (error bars) of at least three independent experiments.
